# Supplementary material
Source: publisher figshare collection journal article supplement (https://acs.figshare.com/ndownloader/files/4242688)
Supplement: Supplementary file 1 [file 4242688]

## Supporting information

### rGO-Wrapped Fullerene (C<sub>60</sub>) Wires

*Jieun Yang<sup>†</sup>, Mihee Heo<sup>†</sup>, Hyo Joong Lee<sup>‡</sup>, Su-Moon Park<sup>†</sup>, Jin Young Kim<sup>†, \*</sup>, Hyeon Suk Shin<sup>†, \*</sup>*

<sup>†</sup>Interdisciplinary School of Green Energy and KIER-UNIST Advanced Center for Energy, Ulsan

National Institute of Science & Technology (UNIST), UNIST-gil 50, Ulsan 689-805, Korea.

<sup>‡</sup> Department of Chemistry, Chonbuk National University, 567 Baekje-deokjin-gu, Jeonju-si, Jeollabuk-

do 561-756, Korea

<sup>\*</sup>E-mail: shin@unist.ac.kr, jykim@unist.ac.kr

<sup>\*</sup>To whom correspondence should be addressed.

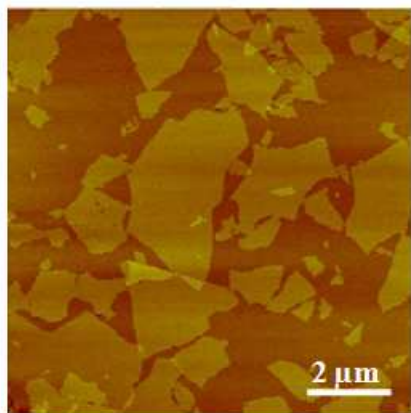

Figure S1. AFM image of reduced graphene oxide (rGO).

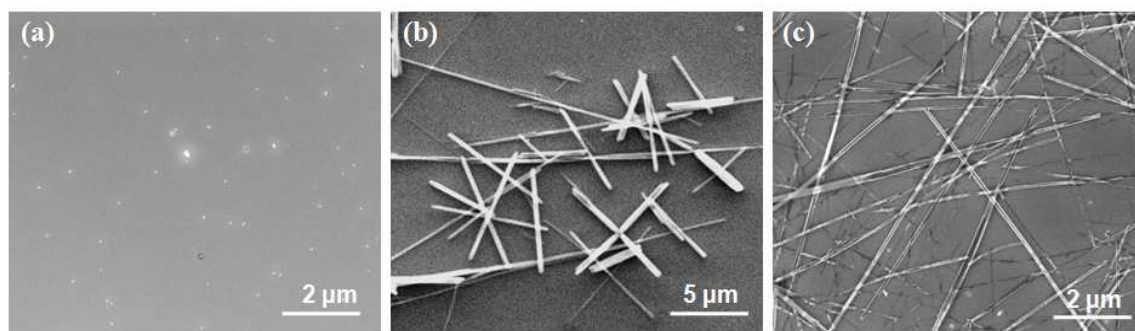

Figure S2. SEM images of  $C_{60}$  particles (a),  $C_{60}$  wires after dropping IPA for 2 min (b), and  $C_{60}$  wires left at 4 °C for 1 h (c).

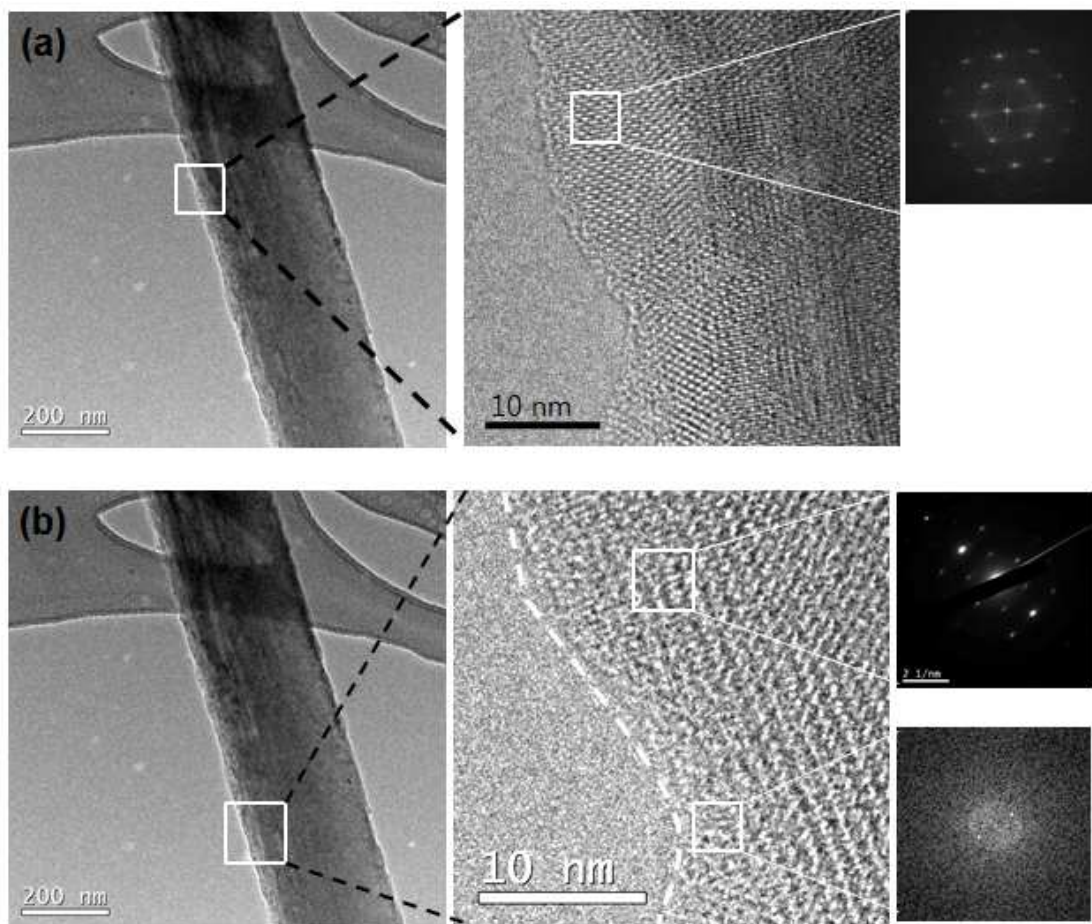

Figure S3. TEM images of a  $C_{60}$  wire. (a) The magnified image of the edge area shows crystalline structure from FFT pattern. (b) The magnified image of other edge area shows the amorphous layer.

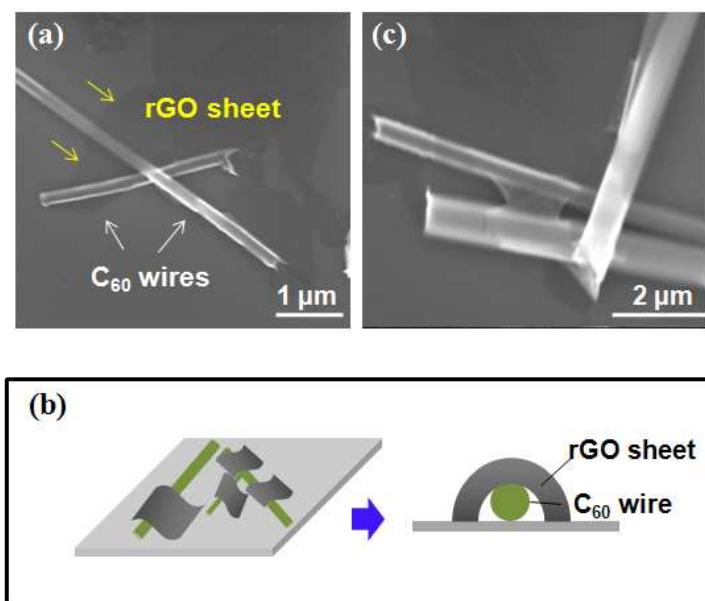

Figure S4. SEM images of  $C_{60}$  wires after they were first prepared and then immersed into rGO solution. (a) and (b) most of rGO sheets did not wrap the  $C_{60}$  wires, but were randomly laid on them. (c) In a part of the sample, some small rGO sheets wrapped them.

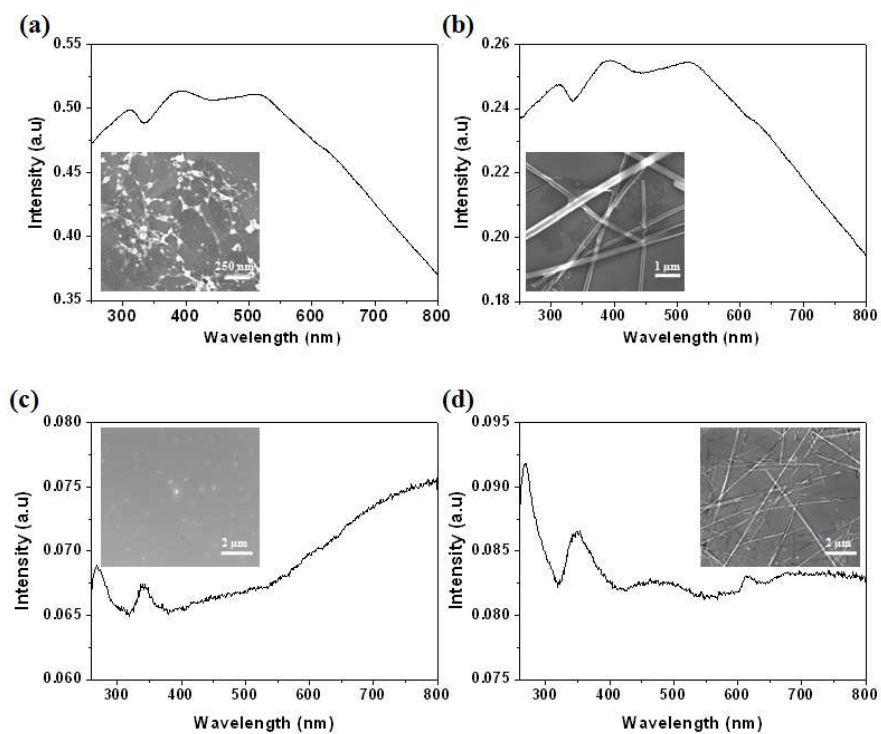

Figure S5. UV-Vis spectra of (a) C<sub>60</sub> precipitates (by adding the rGO IPA solution), (b) rGO/C<sub>60</sub> wires left at 4 °C for 1h, (c) C<sub>60</sub> particles (by adding pure IPA), and (d) C<sub>60</sub> wires left at 4 °C for 1h.

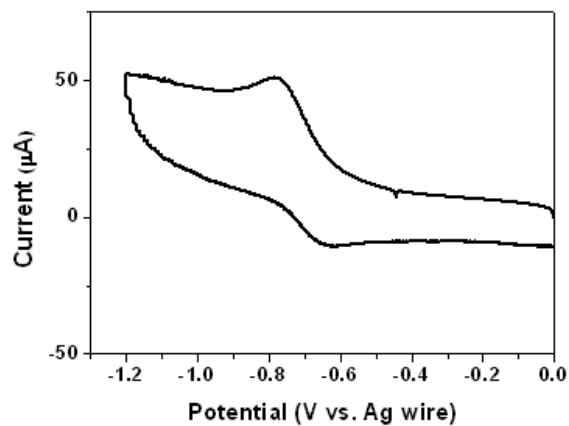

Figure S6. CV curve of rGO on glassy carbon electrode.

Working Electrode: Glassy carbon

Counter Electrode: Pt mesh

Reference: Ag wire

Electrolyte: 0.1 M TBAPF<sub>6</sub> in DMF

Preparation of GO or RGO on glassy carbon electrode: dropping and drying

Fc/Fc<sup>+</sup>: 0.595 V vs. Ag wire

LUMO(eV) = -4.8 – (E<sub>onset</sub> (vs Ag/AgCl) - E<sub>Fc/Fc<sup>+</sup></sub> (vs Ag/AgCl))

E<sub>red</sub> as -0.55 V, E<sub>LUMO</sub> = -3.65 V

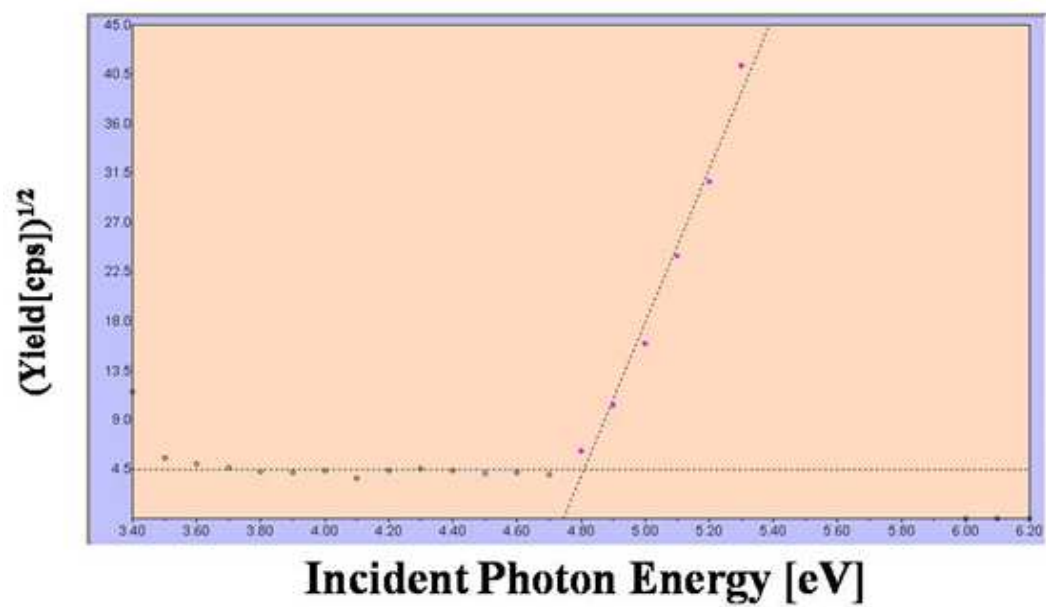

Figure S7. Photoelectron spectrum of rGO.

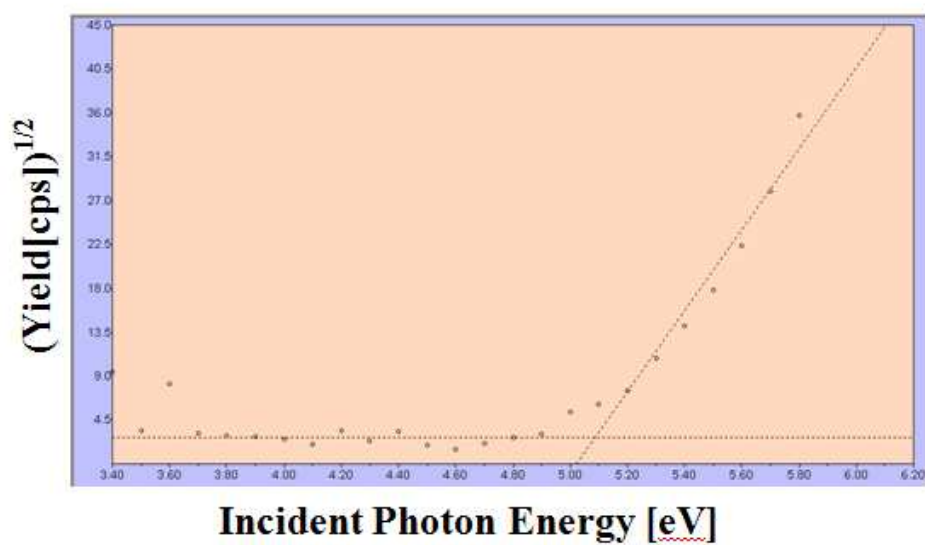

Figure S8. Photoelectron spectrum of  $\text{C}_{60}$  wires.



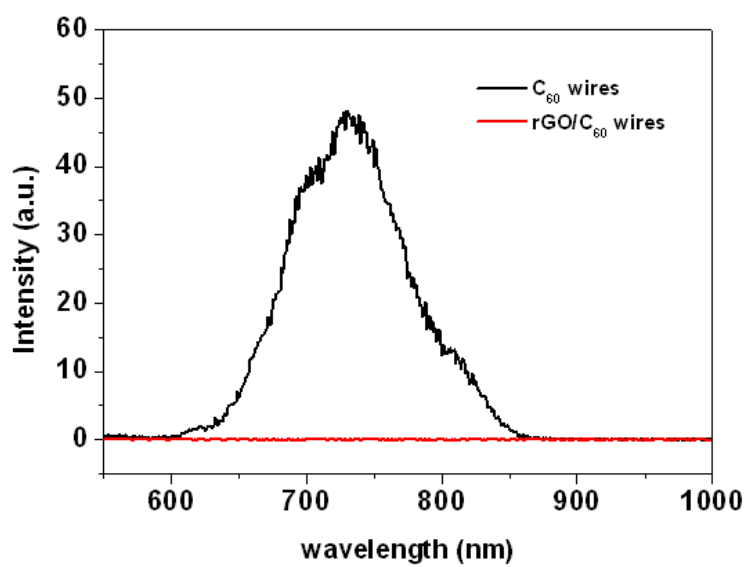

Figure S9. Photoluminescence spectra of  $C_{60}$  wires and  $rGO/C_{60}$  wires obtained with excitation at 520 nm.

Table S1. Element analysis of graphene oxide and reduced graphene oxide

|                | Graphene oxide | Reduced graphene oxide |
|----------------|----------------|------------------------|
| Carbon (wt%)   | <b>41.27</b>   | <b>63.59</b>           |
| Hydrogen (wt%) | <b>2.78</b>    | <b>1.31</b>            |
| Oxygen (wt%)   | <b>28.61</b>   | <b>13.70</b>           |
| Nitrogen (wt%) | <b>0.00</b>    | <b>2.81</b>            |
